# Supplementary material
Source: Springer Nature journal article supplement (https://www.springermedizin.de/resource/supplementary/12888_2013_1491_MOESM1_ESM.pdf/9480474)
Supplement: MOESM1 [file 9480474]

## Enrollment

Interested in participation

Screening

Assessment I - Baseline

Randomisation (N=260)

Exclusion:

- ◆ CES-D > 22
- ◆ risk of suicide (BDI II suicide item >1, SCID)
- ◆ current psychotherapeutic treatment / being present on a waiting list for such treatment
- ◆ pregnancy

## Allocation

Intervention group (n= 130)

- ◆ receive GET.ON M.D.

Control group (n= 130)

- ◆ receive online psychoeducation on depression

## Follow-up

Assessment II: 8 weeks after randomisation

Assessment II: 8 weeks after randomisation

Assessment III: 6 months after randomisation

Assessment III: 6 months after randomisation

Assessment IV: 12 months after randomisation

Assessment IV: 12 months after randomisation
